# Supplementary material
Source: MDPI journal article supplement (https://www.mdpi.com/2073-4441/15/21/3808)
Supplement: s1 [file s1]

## Supplementary Section

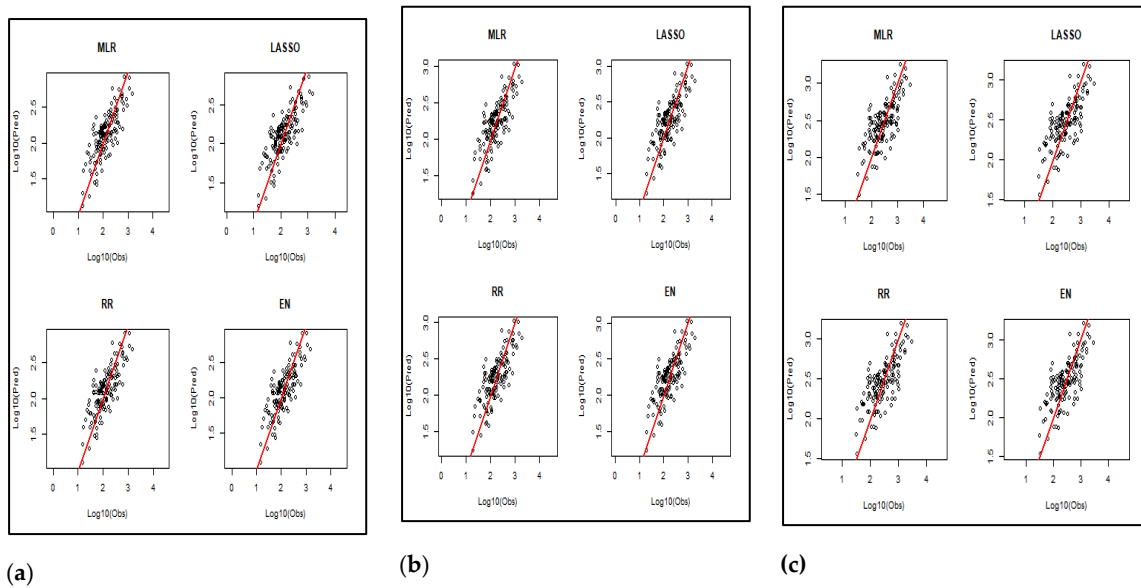

**Figure S1.** Observed versus predicted flood quantiles ( $\text{m}^3/\text{s}$ ) for different regression models: (a) ARI = 5 years; (b) ARI = 10 years; (c) ARI = 50 years.

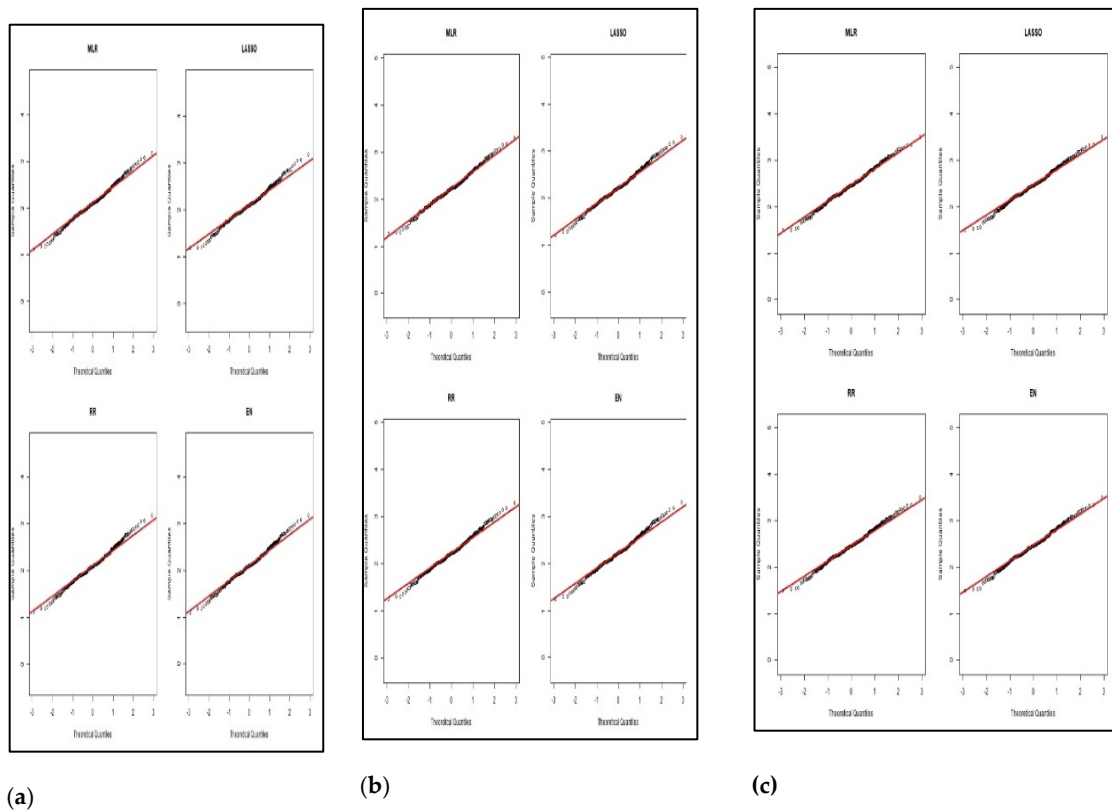

**Figure S2.** Residual quantile–quantile plot for different regression models: (a) ARI = 5 years; (b) ARI = 10 years; (c) ARI = 50 years.

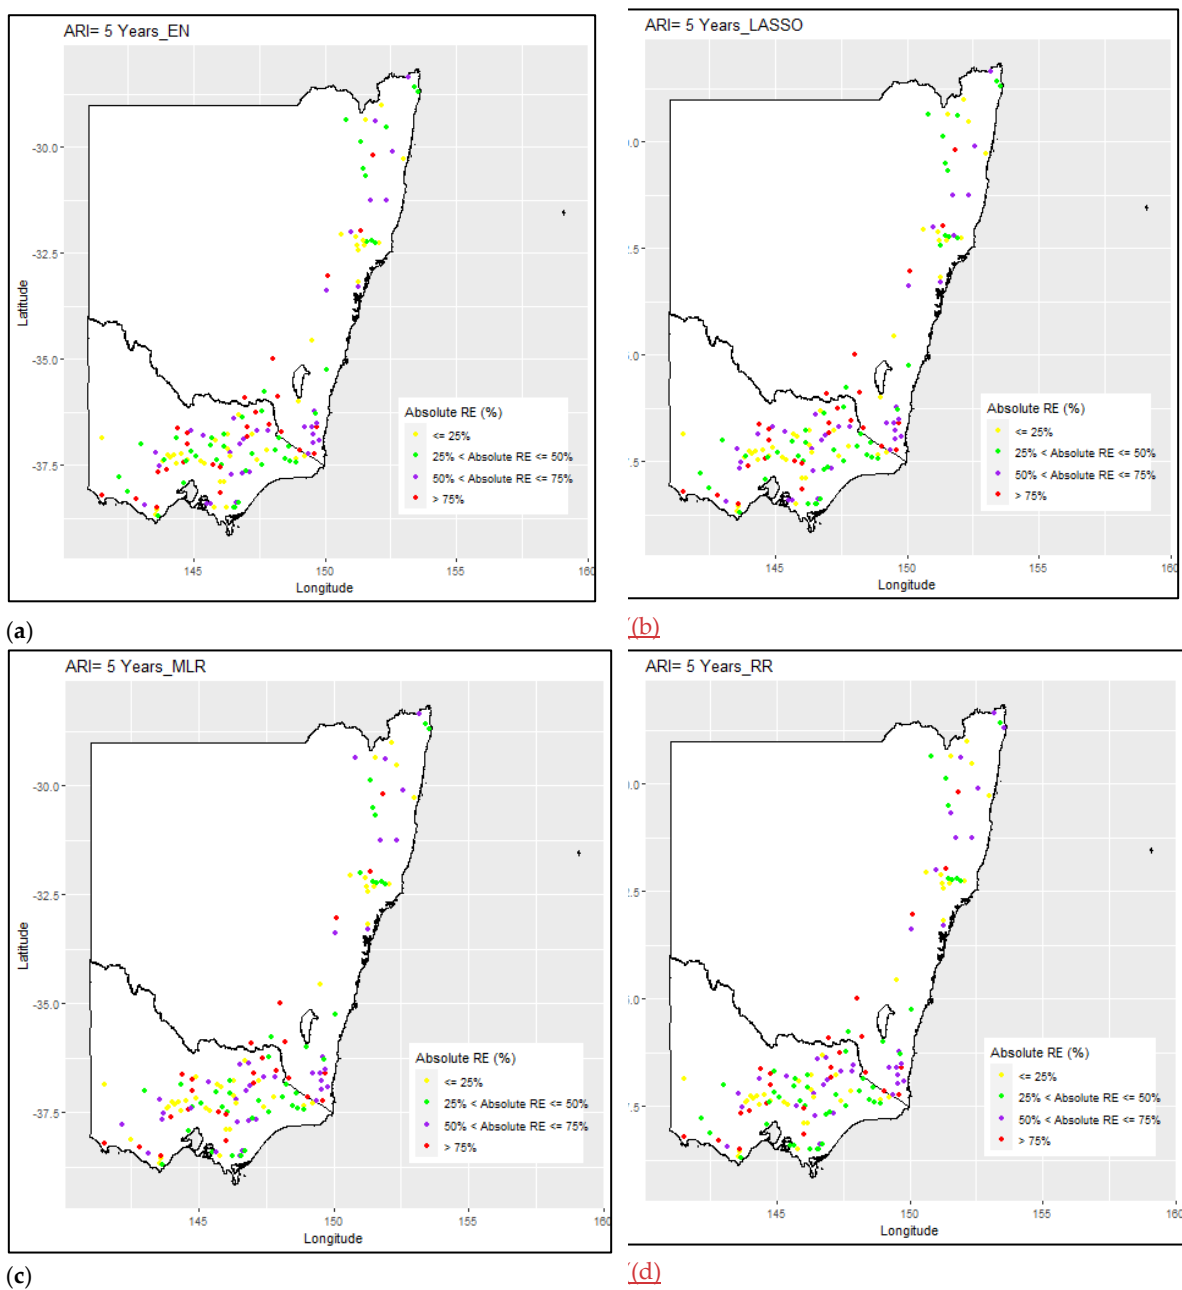

**Figure S3.** Spatial distribution of absolute RE values for different regression models for ARI = 5 years: (a) RR; (b) EN; (c) LASSO; (d) MLR.

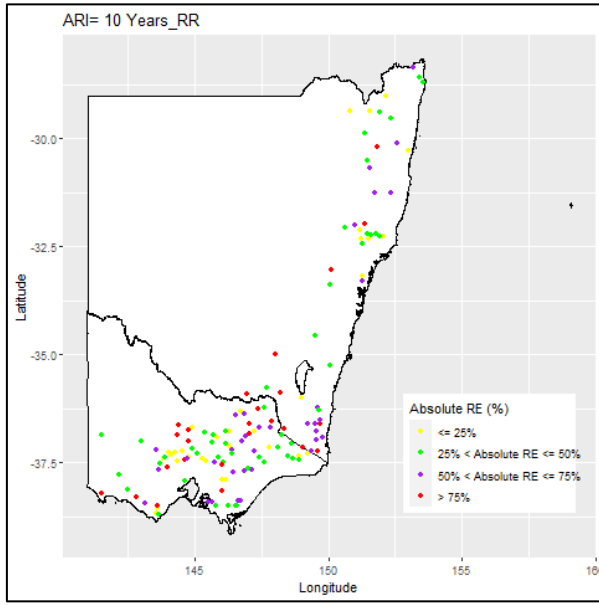

(a)

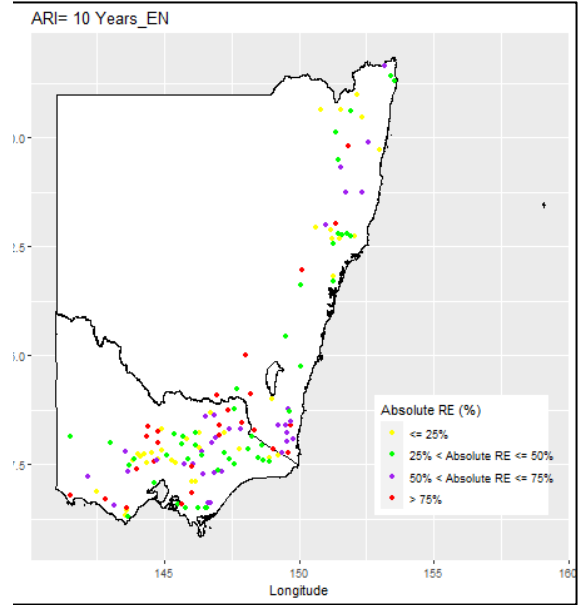

(b)

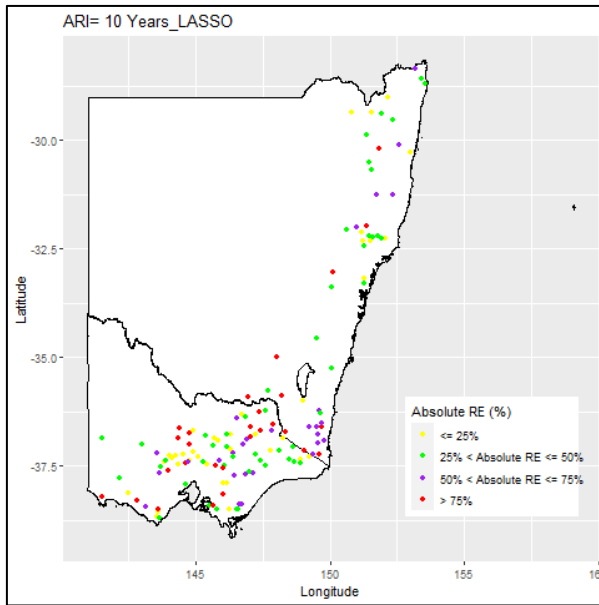

(c)

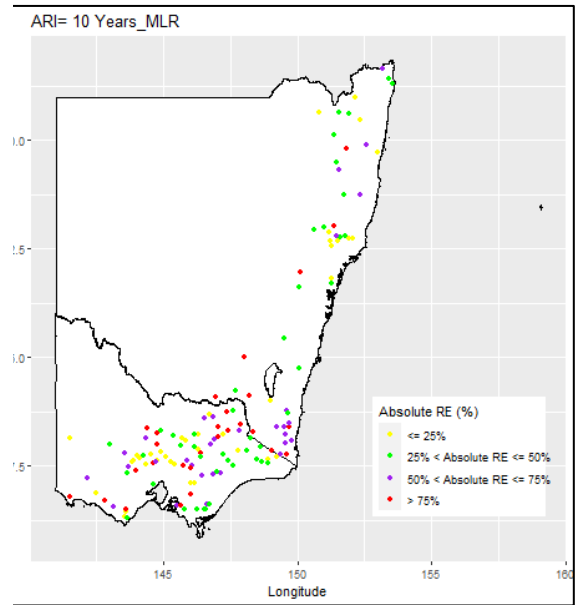

(d)

**Figure S4.** Spatial distribution of absolute RE<sub>r</sub> values for different regression models for ARI = 10 years: (a) RR; (b) EN; (c) LASSO; (d) MLR.

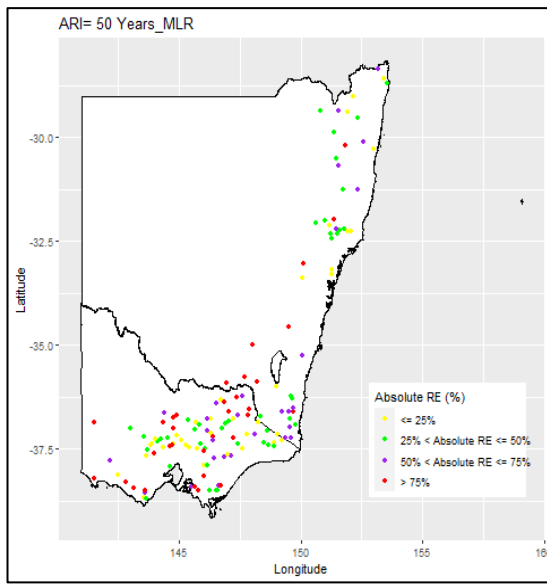

(a)

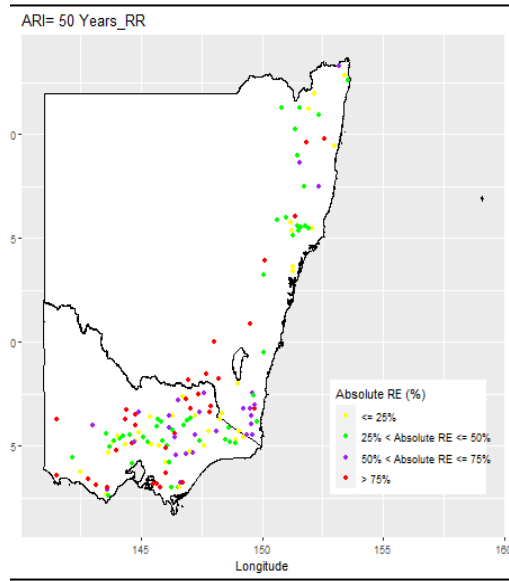

(b)

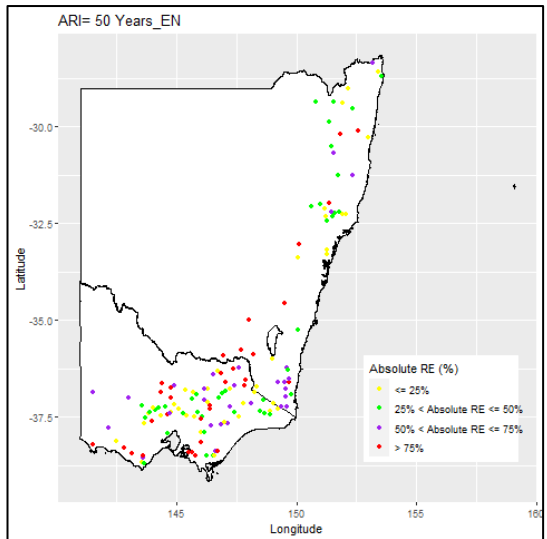

(c)

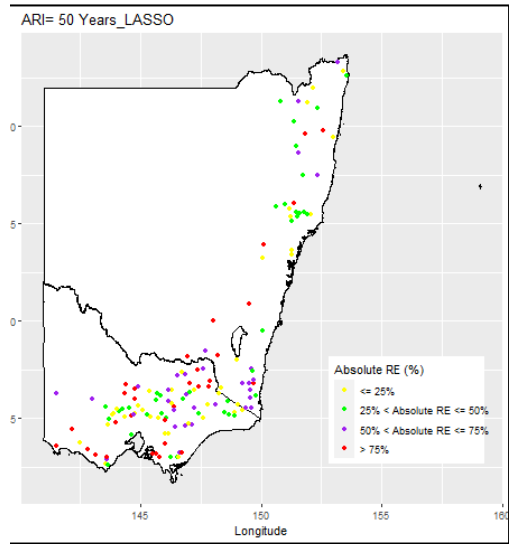

(d)

**Figure S5.** Spatial distribution of absolute RE values for different regression models for ARI = 50 years: (a) RR; (b) EN; (c) LASSO; (d) MLR.

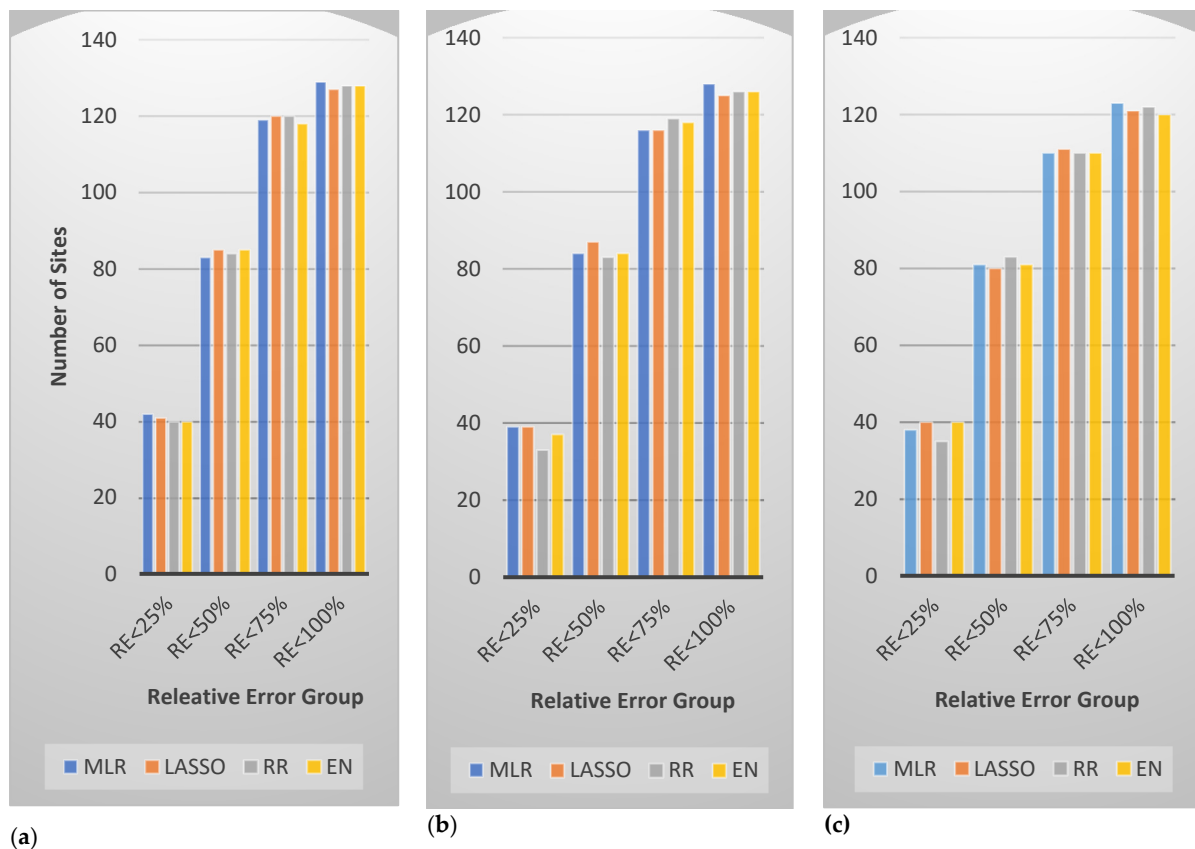

**Figure S6.** Cumulative count of sites having a range of different RE<sub>r</sub> (%) for different regression models: (a) ARI = 5 years; (b) ARI = 10 years; (c) ARI = 50 years.

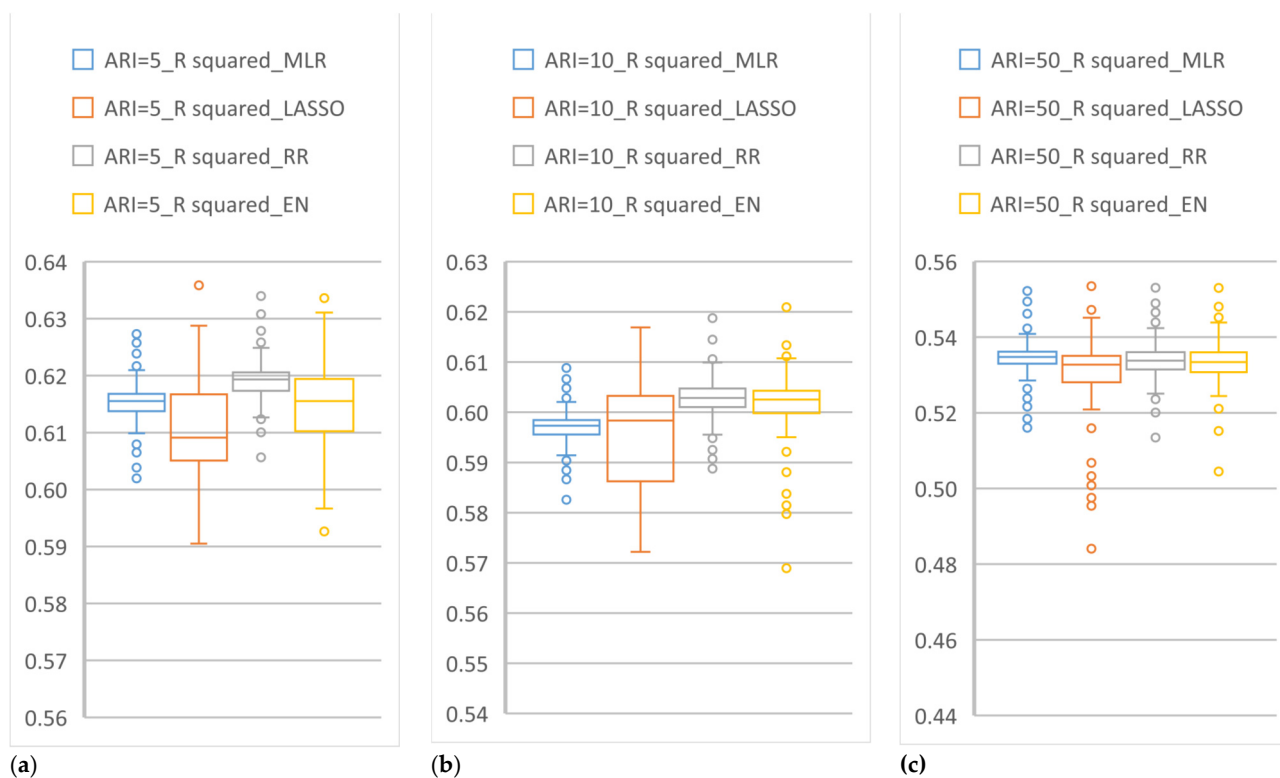

**Figure S7.** R<sup>2</sup> plots based on LOOCV for different regression models: (a) ARI = 5 years; (b) ARI = 10 years; (c) ARI = 50 years.

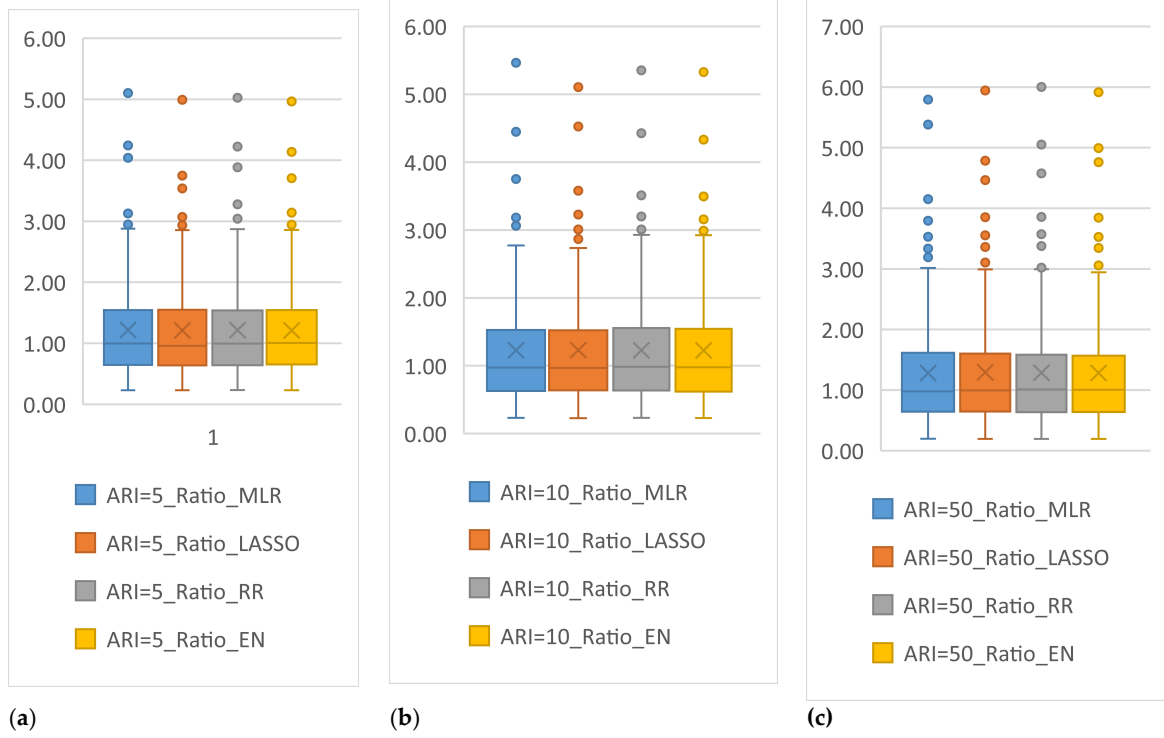

**Figure S8.** Ratio plots using leave-one-out cross-validation based on POT3 model: (a) ARI = 5 years; (b) ARI = 10 years; (c) ARI = 50 years.

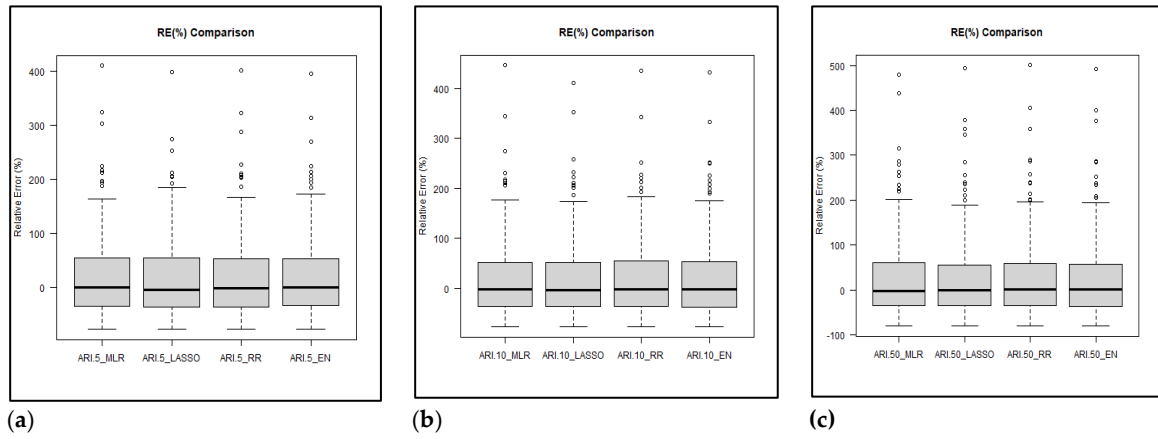

**Figure S9.** Boxplot of  $RE_r$  values for different regression models: (a) ARI = 5 years; (b) ARI = 10 years; (c) ARI = 50 years.

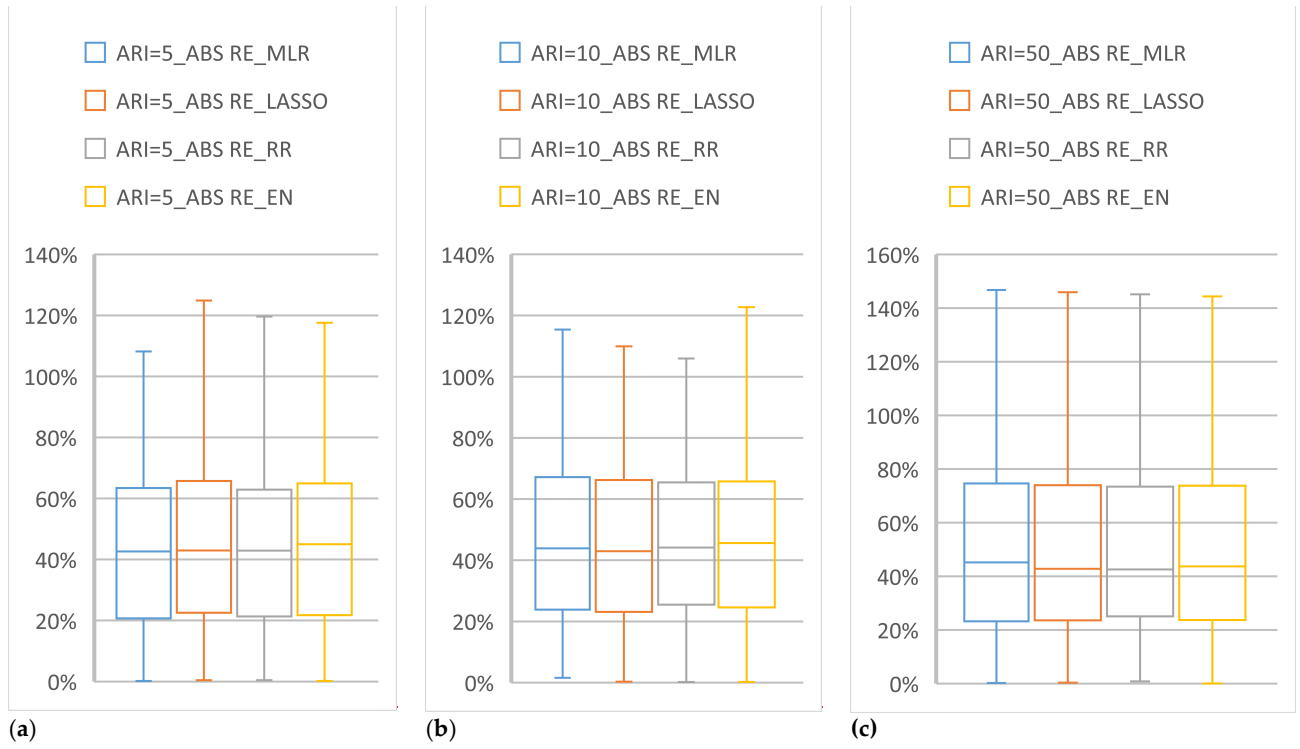

**Figure S10.** Boxplot of  $RE_m$  values for different regression models: (a) ARI = 5 years; (b) ARI = 10 years; (c) ARI = 50 years.
